# Supplementary material
Source: PubMed Central journal article supplement (PMC6561264)
Supplement: pnas.1901407116.sapp.pdf [file pnas.1901407116.sapp.pdf]

## Supplementary Information for

Enhanced susceptibility to chemically-induced colitis caused by excessive endosomal TLR signaling in LRBA-deficient mice

Kuan-Wen Wang, Xiaoming Zhan, William McAlpine, Zhao Zhang, Jin Huk Choi, Hexin Shi, Takuma Misawa, Tao Yue, Duanwu Zhang, Ying Wang, Sara Ludwig, Jamie Russell, Miao Tang, Xiaohong Li, Anne R. Murray, Eva Marie Y. Moresco, Emre E. Turer, and Bruce Beutler

Emre E. Turer or Bruce Beutler

Email: [emre.turer@utsouthwestern.edu](mailto:emre.turer@utsouthwestern.edu) or [bruce.beutler@utsouthwestern.edu](mailto:bruce.beutler@utsouthwestern.edu)

### **This PDF file includes:**

Figs. S1 to S8

Table S1

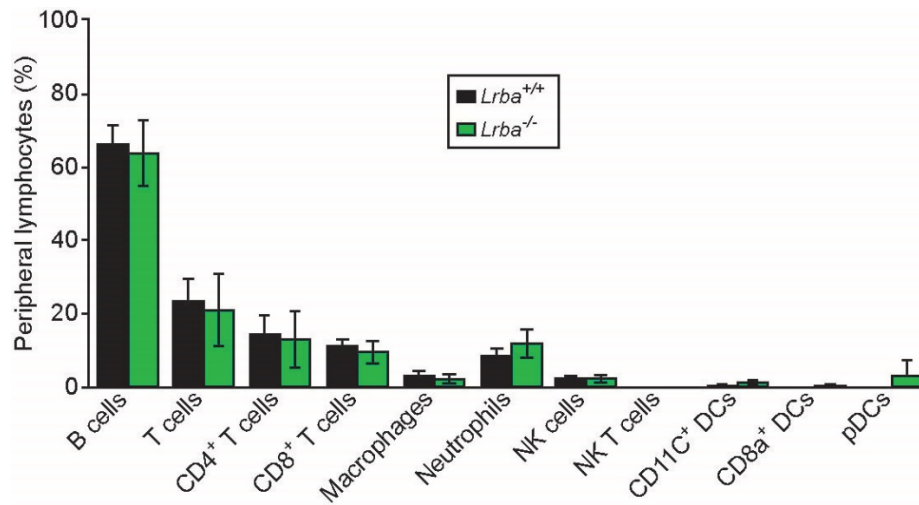

**Fig. S1.** Immune cell populations in the blood of *Lrba*<sup>-/-</sup> mice. (A) Percentage of each cell type in the blood (n=5 mice per genotype). Data are representative of 3 independent experiments (mean ± s.d.).

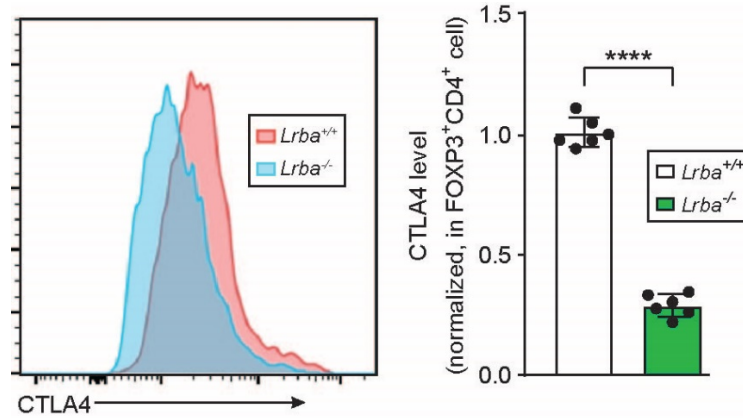

**Fig. S2.** Reduced CTLA4 protein expression in FoxP3<sup>+</sup>CD4<sup>+</sup> cells from *Lrba*<sup>-/-</sup> spleen. *Left*, Flow cytometry of splenocytes from *Lrba*<sup>+/+</sup> and *Lrba*<sup>-/-</sup> mice, assessing expression of CTLA4 in CD3<sup>+</sup>CD4<sup>+</sup>FoxP3<sup>+</sup> cell population. *Right*, Quantification of CTLA4 protein expression in splenic CD3<sup>+</sup>CD4<sup>+</sup>FoxP3<sup>+</sup> cells (mean fluorescence intensity normalized to wild-type). Each symbol represents an individual mouse. \*\*\*\*  $P < 0.0001$  (two-tailed Student's *t*-test). Data are representative of 3 independent experiments (mean  $\pm$  s.d.).

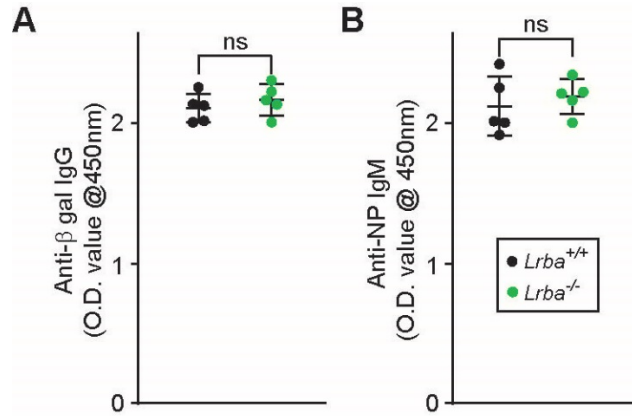

**Fig. S3.** Normal antibody responses to immunization in *Lrba*<sup>-/-</sup> mice. (A) Quantification of  $\beta$ -gal-specific IgG in the blood 13 days after immunization with recombinant Semliki forest virus (rSFV)-encoded  $\beta$ -galactosidase. (B) Quantification of NP-specific IgM in the blood 6 days after immunization with NP-Ficoll. Each symbol represents an individual mouse. Data are representative of 3 independent experiments (mean  $\pm$  s.d.).

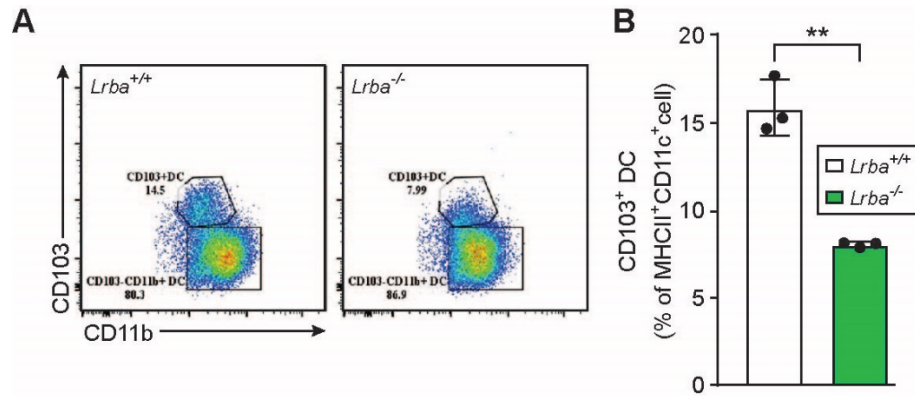

**Fig. S4.** Reduced CD103<sup>+</sup> dendritic cells in colon lamina propria of *Lrba*<sup>-/-</sup> mice. (A) Flow cytometry of colon lamina propria cells from *Lrba*<sup>+/+</sup> and *Lrba*<sup>-/-</sup> mice, assessing expression of CD11b and CD103 in MHC II<sup>+</sup>CD11c<sup>+</sup> cell population. Numbers next to boxed regions represent percent cells in each. (B) Quantification of percentage of CD103<sup>+</sup> cells among MHC II<sup>+</sup>CD11c<sup>+</sup> dendritic cells. Each symbol represents an individual mouse. \*\*  $P < 0.01$  (two-tailed Student's *t*-test). Data are representative of 3 independent experiments (mean  $\pm$  s.d.).

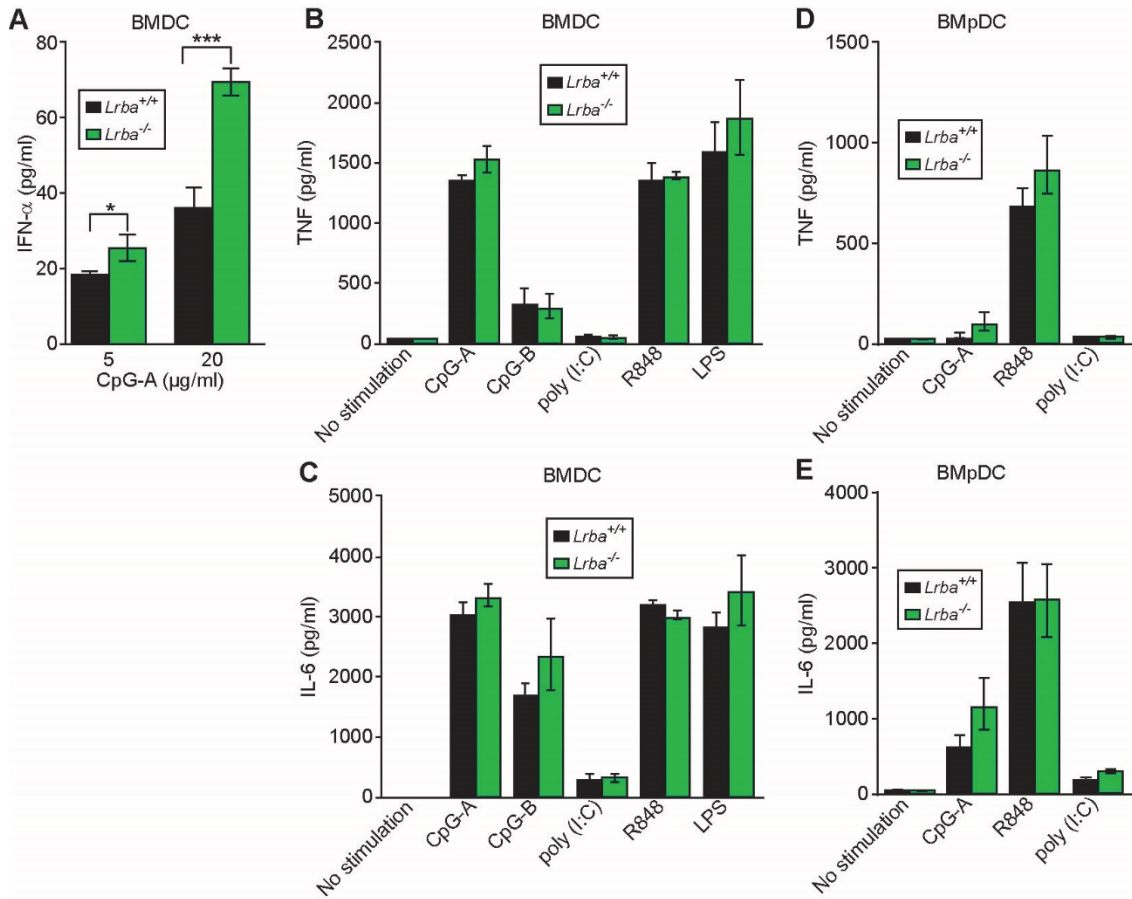

**Fig. S5.** Normal TNF and IL-6 responses to endosomal TLR stimulation in *Lrba*<sup>-/-</sup> dendritic cells. *In vitro* differentiated BMDC or BMpDC were stimulated with TLR ligands for 16 h. (A) Concentration of IFN- $\alpha$  in the culture supernatant of BMDC after stimulation with CpG-A (n=3 independent cultures of each genotype from separate mice). (B-E) Concentration of (B,D) TNF and (C,E) IL-6 in the supernatant of (B,C) BMDC or (D,E) BMpDC after stimulation with the indicated ligands (n=3 independent cultures of each genotype from separate mice). \*  $P < 0.05$ ; \*\*\*  $P < 0.001$  (two-tailed Student's *t*-test). Data are representative of 4 independent experiments (mean  $\pm$  s.d.).

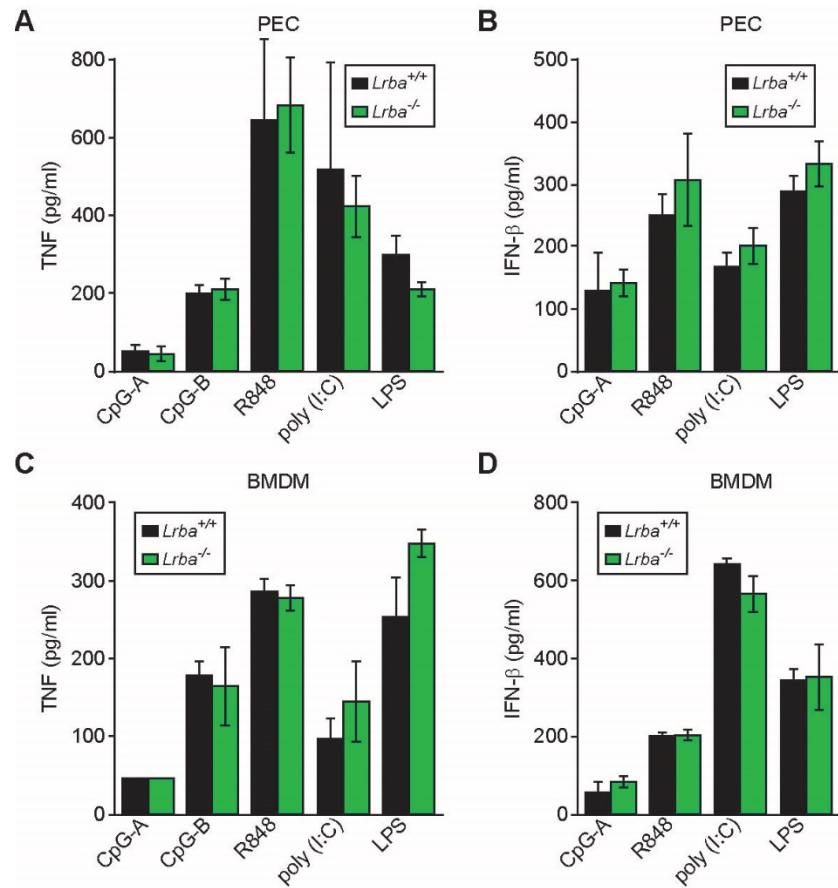

**Fig. S6.** Normal TNF and IFN- $\beta$  production by macrophages after TLR stimulation. Concentration of (A,C) TNF and (B,D) IFN- $\beta$  in the culture supernatant of peritoneal macrophages (PEC, peritoneal exudate cells;  $n=3$  mice per genotype) (A,B) or bone marrow-derived macrophages ( $n=4$  independent cultures of each genotype from separate mice) (C,D) after stimulation with the indicated ligands. Data are representative of 3 independent experiments (mean  $\pm$  s.d.).

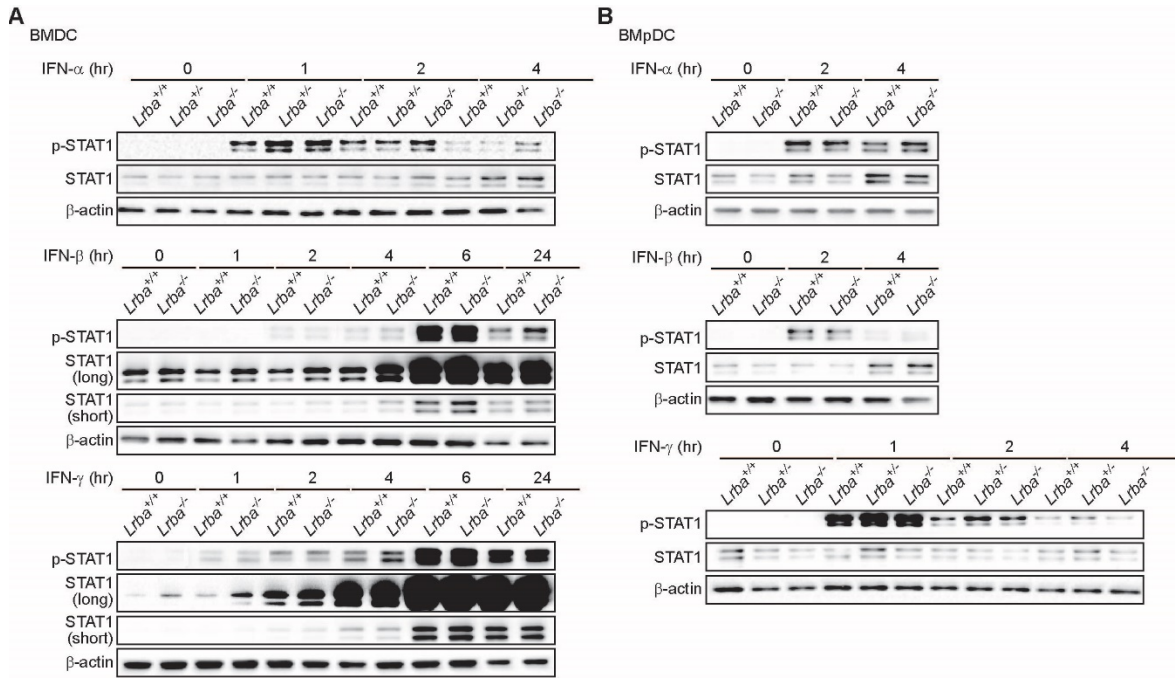

**Fig. S7.** Normal STAT1 activation in *Lrba*<sup>-/-</sup> dendritic cells stimulated with type I or type II IFN. Immunoblot analysis of phosphorylated (p) and total STAT1 in *Lrba*<sup>+/+</sup>, *Lrba*<sup>+/-</sup>, and *Lrba*<sup>-/-</sup> (A) BMDC and (B) BMpDC after stimulation with IFN- $\alpha$ , IFN- $\beta$ , or IFN- $\gamma$ . Data are representative of 2 independent experiments.



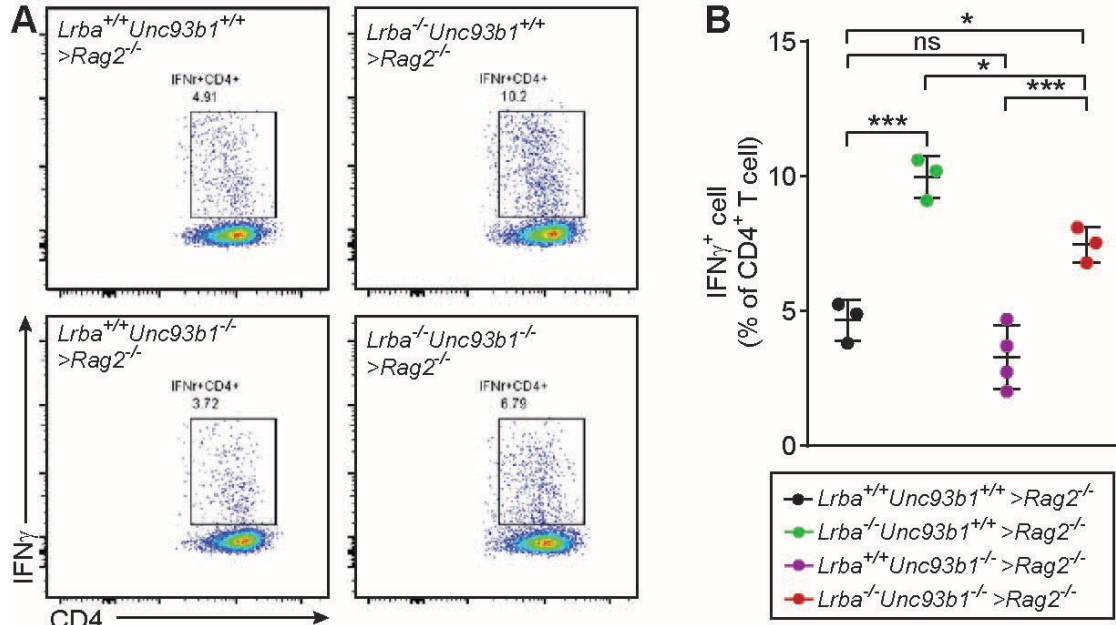

**Fig. S8.** Knockout of UNC93B1 normalizes frequency of IFN- $\gamma$ <sup>+</sup> CD4<sup>+</sup> T cells in *Lrba*<sup>-/-</sup> spleen. Bone marrow transplantation was performed using mice of the indicated genotypes (donor > recipient). (A) Flow cytometry of splenocytes from bone marrow chimeric mice, assessing expression of IFN- $\gamma$  by CD4<sup>+</sup> T cells. Numbers above boxed regions represent percent cells in each. (B) Quantification of percentage of splenic CD4<sup>+</sup> T cells expressing IFN- $\gamma$ . Each symbol (B) represents an individual mouse. \*  $P < 0.05$ , \*\*\*  $P < 0.001$  (one-way ANOVA with post hoc Tukey multiple comparisons test). Data are representative of 3 independent experiments (mean  $\pm$  s.d. in graph).

**Table S1. RT-qPCR Primer Sequences**

| <b>Primer</b>        | <b>Sequences</b>            |
|----------------------|-----------------------------|
| <i>Ccl2</i> qPCR F   | CTCAGCCAGATGCAGTTAACG       |
| <i>Ccl2</i> qPCR R   | AAACTACAGCTTCTTTGGGACAC     |
| <i>Ccl3</i> qPCR F   | CTTCTCAGCGCCATATGGAG        |
| <i>Ccl3</i> qPCR R   | CTGCCGTTTCTCTTAGTCAG        |
| <i>Ccl7</i> qPCR F   | CATCCACATGCTGCTATGTC        |
| <i>Ccl7</i> qPCR R   | TTGTCTTGAAGATAACAGCTTCCC    |
| <i>Cxcl10</i> qPCR F | CAACTGCATCCATATCGATGAC      |
| <i>Cxcl10</i> qPCR R | TTTCATCGTGGCAATGATCTC       |
| <i>Gapdh</i> qPCR F  | CGACTTCAACAGCAACTCCCCTCTTCC |
| <i>Gapdh</i> qPCR R  | TGGGTGGTCCAGGGTTTCTTACTCCTT |
| <i>Ifit1</i> qPCR F  | CGTAGCCTATCGCCAAGATTTA      |
| <i>Ifit1</i> qPCR R  | AGCTTTAGGGCAAGGAGAAC        |
| <i>Ifit2</i> qPCR F  | GTAGATCTGGAAGGGCCTAAATG     |
| <i>Ifit2</i> qPCR R  | CAAGCTGAACCCAGTAGAGAAA      |
| <i>Ifna</i> qPCR F   | GGACTTTGGATTCCCAGGAGAAG     |
| <i>Ifna</i> qPCR R   | GCTGCATCAGACAGCCTTGCAGGTC   |
| <i>Ifnb</i> qPCR F   | AACCTCACCTACAGGGCGGACTTCA   |
| <i>Ifnb</i> qPCR R   | TCCCACGTCAATCTTTCCTCTTGCTTT |
| <i>Ifng</i> qPCR F   | CAGCAACAGCAAGGCGAAA         |
| <i>Ifng</i> qPCR R   | CTGGACCTGTGGGTTGTTGAC       |
| <i>Il10</i> qPCR F   | AGGACTTTAAGGGTACTTGGG       |
| <i>Il10</i> qPCR R   | GTCTTCAGCTTCTCACCCAG        |
| <i>Il17a</i> qPCR F  | GCTGGACCACCACATGAA          |
| <i>Il17a</i> qPCR R  | GCATCTTCTCGACCCTGAAA        |
| <i>Il18</i> qPCR F   | TTCTTTGAGGAAATGGATCCAC      |
| <i>Il18</i> qPCR R   | TGGCAAGCAAGAAAGTGTCC        |
| <i>Il1b</i> qPCR R   | TGCCGTCTTTCATTACACAG        |
| <i>Il1b</i> qPCR F   | CAACCAACAAGTGATATTCTCC      |
| <i>Il6</i> qPCR F    | CTCTGCAAGAGACTTCCATCC       |
| <i>Il6</i> qPCR R    | CGACTTGTGAAGTGGTATAGACAG    |
| <i>Irf3</i> qPCR F   | CTTCATGGAAGGAAGTGGAC        |
| <i>Irf3</i> qPCR R   | TAGGAACAACCTTGACCATCAC      |
| <i>Irf7</i> qPCR F   | TTTCTTCCGAGAAGTGGAGGAG      |
| <i>Irf7</i> qPCR R   | ACCAGGATCAGGGTCTTCTC        |
| <i>Mx2</i> qPCR F    | CATCTGTAAATCTTCTCTCTGCT     |
| <i>Mx2</i> qPCR R    | TTCACTGTCATCTTCTGGTATGTC    |
| <i>Oas1g</i> qPCR F  | TTAGAGTCAAGTTTGAGGTCCA      |
| <i>Oas1g</i> qPCR R  | TGATACTACCATGACCCAGGA       |
| <i>Rantes</i> qPCR F | TTGCAGTCGTGTTTGTCACTC       |
| <i>Rantes</i> qPCR R | GCAATGACAGGGAAGCTATACAG     |
| <i>Rnasel</i> qPCR F | GCTTACAATGTCTCCAGATGAGG     |
| <i>Rnasel</i> qPCR R | TATAGCGGTTCTCCAAGTC         |
| <i>Tnf</i> qPCR F    | AGGCTGCCCCGACTACGT          |
| <i>Tnf</i> qPCR R    | GACTTTCTCTGGTATGAGATAGCAAA  |
| <i>Trim5</i> qPCR F  | CATAGAAATACTACAGGGTGTGGA    |
| <i>Trim5</i> qPCR R  | CTCGGAACCTTCTTTGTTCCC       |
